# Supplementary material
Source: Springer Nature journal article supplement (https://www.springermedizin.de/resource/supplementary/12916_2012_630_MOESM4_ESM.pdf/9597988)

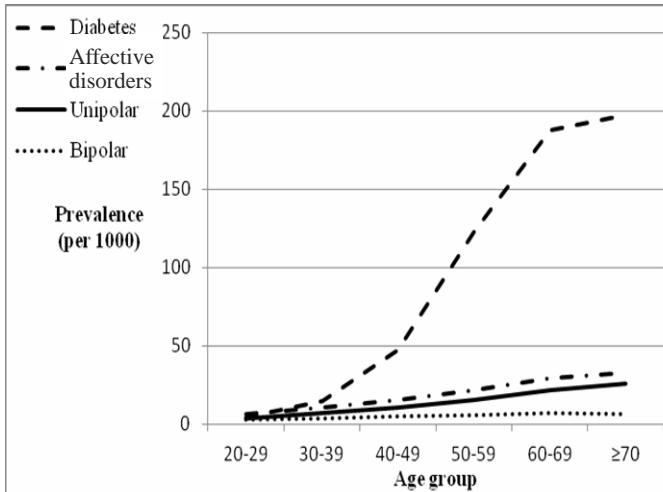

Total

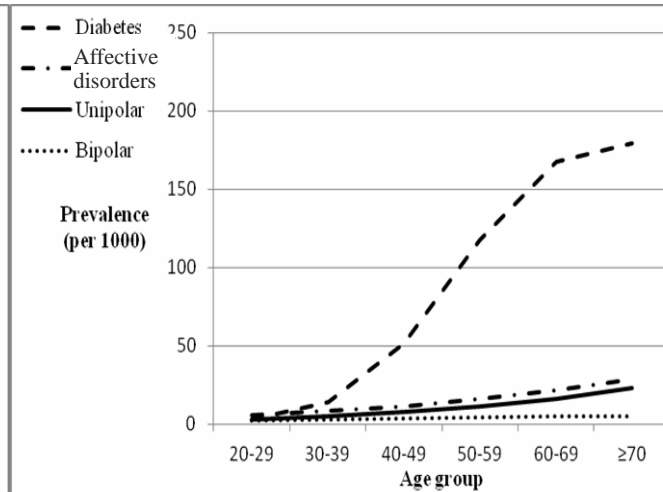

Men

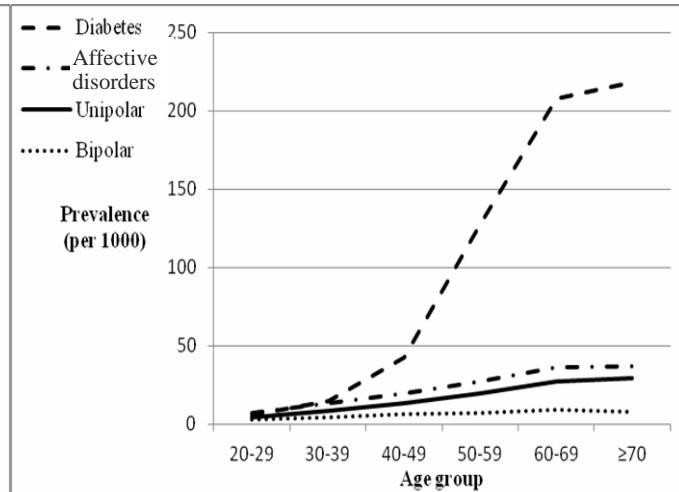

Women

Supplement: MOESM4 [file 9597988]
